# Supplementary material for: Differences in the Tumor Molecular and Microenvironmental Land-Scape Between Early (Non-metastatic) and De Novo Metastatic Primary Luminal Breast Tumors
Source: Preprints.org preprint supplement (doi:10.20944/preprints202306.1845.v1), 2023-06-27
Supplement: Supplementary file 1 [file supplementary]

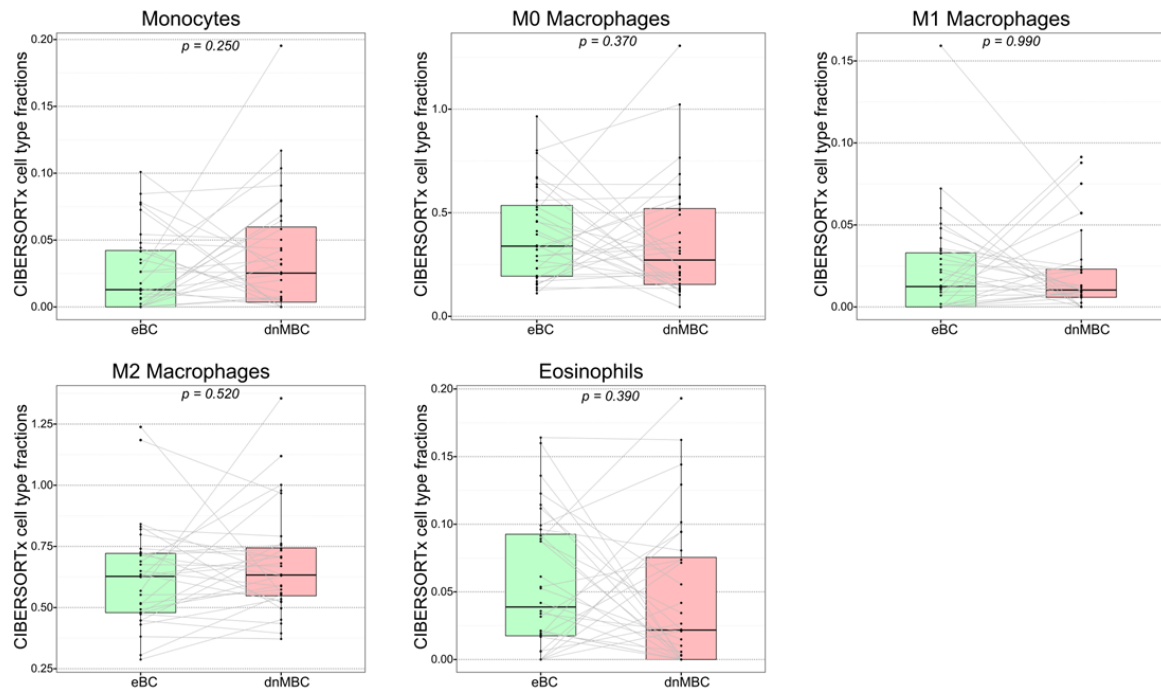

**Supplementary Figure S5: Integrated boxplots of paired Wilcoxon analysis of cell type fractions in the CIBERSORTx software between eBC and dnMBC group.** P-values are FDR-corrected. dnMBC: de novo metastasized breast tumor group; eBC: non-primary metastatic breast tumor group; FDR: false discovery rate. M0: non-activated; M1: pro-inflammatory; M2: anti-inflammatory.
