# Supplementary material for: Differences in the Tumor Molecular and Microenvironmental Land-Scape Between Early (Non-metastatic) and De Novo Metastatic Primary Luminal Breast Tumors
Source: Preprints.org preprint supplement (doi:10.20944/preprints202306.1845.v1), 2023-06-27
Supplement: Supplementary file 1 [file supplementary]

**Supplementary Table S8: DEG differences found in the regulatory gene category between dnMBC and eBC tumors.** The gene name, ENSG number, log fold change (logFC), log counts per million (logCPM), log fold change ratio (LR), raw p-value, and FDR-corrected p-value are reported. The base of the log is 2. The direction of logFC is dnMBC vs. eBC. A negative value means a downregulation of the DEG in dnMBC tumors and a positive value means an upregulation of the DEG in dnMBC tumors compared to eBC tumors. The p-values were calculated using paired t-test by using EdgeR. ENSG: Ensembl gene ID; FDR: false discovery rate; snoRNA: small nucleolar RNA.

| **Gene category** | **Gene name** | **ENSG number** | **logFC** | **logCPM** | **LR** | **P-values** | |
| --- | --- | --- | --- | --- | --- | --- | --- |
| **Raw** | **FDR** |
| snoRNAs | SNORA38B | ENSG00000200394 | -3.632 | 0.160 | 64.665 | <0.001 | <0.001 |
| SNORA46 | ENSG00000207493 | -3.398 | 5.657 | 78.573 | <0.001 | <0.001 |
| SNORA54 | ENSG00000207008 | -3.125 | 8.499 | 65.593 | <0.001 | <0.001 |
| SNORA71D | ENSG00000200354 | -2.934 | 7.394 | 62.719 | <0.001 | <0.001 |
| SNORA80B | ENSG00000206633 | -4.457 | 2.313 | 94.635 | <0.001 | <0.001 |
| SNORD10 | ENSG00000238917 | -3.224 | 5.153 | 124.527 | <0.001 | <0.001 |
| SNORD114-18 | ENSG00000202142 | -2.670 | -1.200 | 13.032 | <0.001 | 0.002 |
| SNORD115-31 | ENSG00000202188 | -2.994 | -2.678 | 8.483 | 0.004 | 0.013 |
| SNORD116-6 | ENSG00000207442 | -2.859 | -0.454 | 9.145 | 0.002 | 0.010 |
| SNORD116-8 | ENSG00000207093 | -2.658 | 0.927 | 14.518 | <0.001 | 0.001 |
| SNORD66 | ENSG00000212158 | -2.654 | 2.963 | 57.725 | <0.001 | <0.001 |
| SNORD83A | ENSG00000209482 | -3.602 | 3.011 | 96.944 | <0.001 | <0.001 |
| SNORD94 | ENSG00000208772 | -3.109 | 6.450 | 91.111 | <0.001 | <0.001 |
| SNORD3A | ENSG00000202364 | -3.616 | 11.339 | 62.220 | <0.001 | <0.001 |
| microRNAs | MIR10A | ENSG00000207777 | -3.621 | -0.678 | 24.516 | <0.001 | <0.001 |
| MIR10B | ENSG00000207744 | -5.263 | -0.978 | 29.651 | <0.001 | <0.001 |
| MIR197 | ENSG00000207709 | -2.542 | -0.669 | 23.147 | <0.001 | <0.001 |
| MIR199A2 | ENSG00000208024 | -3.611 | -1.312 | 29.296 | <0.001 | <0.001 |
| MIR200A | ENSG00000207607 | -3.166 | -0.515 | 32.431 | <0.001 | <0.001 |
| MIR200B | ENSG00000207730 | -2.666 | -1.228 | 12.290 | <0.001 | 0.002 |
| MIR27B | ENSG00000207864 | -3.210 | -0.167 | 32.210 | <0.001 | <0.001 |
| MIR29b | ENSG00000207790 | -2.531 | 0.060 | 26.030 | <0.001 | <0.001 |
| MIR29c | ENSG00000207966 | -4.099 | 0.206 | 71.285 | <0.001 | <0.001 |
| MIR-34A | ENSG00000207865 | -2.568 | -0.923 | 6.702 | 0.010 | 0.030 |
| MIR365A | ENSG00000199130 | -4.730 | 0.438 | 54.556 | <0.001 | <0.001 |
| MIR425 | ENSG00000199032 | -5.358 | -0.840 | 27.469 | <0.001 | <0.001 |
| MIR539 | ENSG00000202560 | -4.027 | -1.463 | 8.502 | 0.004 | 0.013 |
| MIR544A | ENSG00000207587 | -3.197 | 0.113 | 14.490 | <0.001 | <0.001 |
| MIR545 | ENSG00000207820 | -3.029 | -0.299 | 22.668 | <0.001 | <0.001 |
| MIR98 | ENSG00000207787 | -3.202 | -0.486 | 40.769 | <0.001 | <0.001 |
| MIRLET7A1 | ENSG00000199165 | -4.079 | 0.968 | 71.702 | <0.001 | <0.001 |
| MIRLET7D | ENSG00000199133 | -4.595 | 1.434 | 76.848 | <0.001 | <0.001 |
| MIRLET7DHG | ENSG00000230262 | -3.736 | -0.451 | 27.177 | <0.001 | <0.001 |
| MIRLET7F1 | ENSG00000199072 | -2.527 | 0.032 | 24.516 | <0.001 | <0.001 |
| MIRLET7I | ENSG00000199179 | -3.911 | -0.743 | 33.773 | <0.001 | <0.001 |
| Pseudogenes | AC073069.1 | ENSG00000237260 | -2.618 | -0.264 | 18.149 | <0.001 | <0.001 |
| AC084198.1 | ENSG00000243396 | -2.617 | -0.780 | 16.900 | <0.001 | <0.001 |
| AC131392.2 | ENSG00000251158 | -3.659 | 0.006 | 26.196 | <0.001 | <0.001 |
| AL732414.1 | ENSG00000227934 | -2.854 | 0.442 | 24.010 | <0.001 | <0.001 |
| ALG1L15P | ENSG00000242017 | -3.196 | -0.695 | 12.656 | <0.001 | 0.002 |
| CDH12P2 | ENSG00000249230 | -2.821 | -0.894 | 15.273 | <0.001 | 0.001 |
| DUSP5P1 | ENSG00000183929 | -2.696 | -1.592 | 8.380 | 0.004 | 0.014 |
| DUX4L26 | ENSG00000236138 | -3.232 | 1.412 | 26.191 | <0.001 | <0.001 |
| FAM90A20P | ENSG00000233295 | -2.513 | 3.128 | 30.785 | <0.001 | <0.001 |
| FAM90A24P | ENSG00000215354 | -4.191 | -1.288 | 6.646 | 0.010 | 0.031 |
| LSP1P2 | ENSG00000240665 | -2.517 | -0.521 | 10.714 | 0.001 | 0.005 |
| NSUN5P1 | ENSG00000223705 | -2.640 | 0.844 | 37.793 | <0.001 | <0.002 |
| NUTM2E | ENSG00000228570 | -2.679 | -0.576 | 7.117 | 0.008 | 0.025 |
| OGFOD1P1 | ENSG00000231665 | -2.603 | -0.701 | 21.116 | <0.001 | <0.002 |
| PMS2P6 | ENSG00000174384 | -2.573 | 3.045 | 14.223 | <0.001 | 0.001 |
| POM121L7P | ENSG00000239511 | -2.918 | 1.142 | 30.511 | <0.001 | <0.002 |
| PSG10P | ENSG00000248257 | -3.611 | 0.418 | 9.551 | 0.002 | 0.008 |
| RNU1-11P | ENSG00000206702 | -3.154 | 2.690 | 66.382 | <0.001 | <0.001 |
| RNU1-67P | ENSG00000207175 | -3.986 | 0.453 | 37.232 | <0.001 | <0.001 |
| RPS2P32 | ENSG00000232818 | -2.814 | -0.731 | 21.486 | <0.001 | <0.001 |
| RPS7P3 | ENSG00000231940 | -2.660 | 0.719 | 21.315 | <0.001 | <0.001 |
| RPSAP39 | ENSG00000244002 | -2.716 | -0.949 | 15.238 | <0.001 | 0.001 |
| SERPINH1P1 | ENSG00000229207 | -2.694 | 0.020 | 16.291 | <0.001 | <0.002 |
