# Supplementary material for: Differences in the Tumor Molecular and Microenvironmental Land-Scape Between Early (Non-metastatic) and De Novo Metastatic Primary Luminal Breast Tumors
Source: Preprints.org preprint supplement (doi:10.20944/preprints202306.1845.v1), 2023-06-27
Supplement: Supplementary file 3 [file supplementary]

Archive with 8 entries (8 files):
- Supplementary Figure S4.pdf
- Supplementary Figure S5.pdf
- Supplementary Table S1 - Tumor characteristics.docx
- Supplementary Table S2 - GSVA.docx
- Supplementary Table S3 - Hypoxia-related DEGs.docx
- Supplementary Table S6 - NLR data.docx
- Supplementary Table S7 - Immunity-related DEGs.docx
- Supplementary Table S8.docx
