# Supplementary material for: Differences in the Tumor Molecular and Microenvironmental Land-Scape Between Early (Non-metastatic) and De Novo Metastatic Primary Luminal Breast Tumors
Source: Preprints.org preprint supplement (doi:10.20944/preprints202306.1845.v1), 2023-06-27
Supplement: Supplementary file 3 [file Supplementary Table S2 - GSVA.docx]

**Supplementary Table S2: Gene Set Variation Analysis (GSVA) between primary dnMBC tumors vs. eBC.** The hallmark pathways, mean difference, raw p-value, and FDR-corrected p-value are reported. The direction of the mean difference is dnMBC vs. eBC. A negative value means a downregulation of the hallmark pathways in dnMBC tumors and a positive value means an upregulation of the hallmark pathways in dnMBC tumors compared to eBC tumors. The p-values were calculated using a paired-test. FDR: false discovery rate.

| **Hallmarks** | **Mean difference** | **P-values** | |
| --- | --- | --- | --- |
| **Raw** | **FDR** |
| HALLMARK_HEME_METABOLISM | -0.010 | 0.018 | 0.396 |
| HALLMARK_UV_RESPONSE_UP | -0.018 | 0.020 | 0.396 |
| HALLMARK_ANDROGEN_RESPONSE | -0.015 | 0.031 | 0.396 |
| HALLMARK_PANCREAS_BETA_CELLS | -0.031 | 0.036 | 0.396 |
| HALLMARK_KRAS_SIGNALING_DN | -0.012 | 0.047 | 0.396 |
| HALLMARK_PROTEIN_SECRETION | -0.013 | 0.048 | 0.396 |
| HALLMARK_PI3K_AKT_MTOR_SIGNALING | -0.010 | 0.056 | 0.396 |
| HALLMARK_MTORC1_SIGNALING | -0.016 | 0.087 | 0.422 |
| HALLMARK_GLYCOLYSIS | -0.010 | 0.095 | 0.422 |
| HALLMARK_REACTIVE_OXIGEN_SPECIES_PATHWAY | -0.016 | 0.097 | 0.422 |
| HALLMARK_MYC_TARGETS_V1 | -0.019 | 0.098 | 0.422 |
| HALLMARK_ADIPOGENESIS | -0.011 | 0.113 | 0.422 |
| HALLMARK_INTERFERON_ALPHA_RESPONSE | -0.035 | 0.115 | 0.422 |
| HALLMARK_PEROXISOME | -0.009 | 0.118 | 0.422 |
| HALLMARK_CHOLESTEROL_HOMEOSTASIS | -0.012 | 0.131 | 0.435 |
| HALLMARK_FATTY_ACID_METABOLISM | -0.009 | 0.190 | 0.591 |
| HALLMARK_ESTROGEN_RESPONSE_LATE | -0.013 | 0.201 | 0.591 |
| HALLMARK_P53_PATHWAY | -0.005 | 0.221 | 0.613 |
| HALLMARK_ANGIOGENESIS | -0.013 | 0.255 | 0.613 |
| HALLMARK_HEDGEHOG_SIGNALING | -0.011 | 0.266 | 0.613 |
| HALLMARK_OXIDATIVE_PHOSPHORYLATION | -0.011 | 0.270 | 0.613 |
| HALLMARK_MYC_TARGETS_V2 | -0.013 | 0.281 | 0.613 |
| HALLMARK_INTERFERON_GAMMA_RESPONSE | -0.020 | 0.282 | 0.613 |
| HALLMARK_SPERMATOGENESIS | -0.009 | 0.310 | 0.629 |
| HALLMARK_IL2_STAT5_SIGNALING | -0.010 | 0.314 | 0.629 |
| HALLMARK_MYOGENESIS | -0.010 | 0.335 | 0.644 |
| HALLMARK_COAGULATION | -0.009 | 0.388 | 0.701 |
| HALLMARK_HYPOXIA | -0.007 | 0.400 | 0.701 |
| HALLMARK_XENOBIOTIC_METABOLISM | -0.005 | 0.406 | 0.701 |
| HALLMARK_UNFOLDED_PROTEIN_RESPONSE | -0.005 | 0.442 | 0.707 |
| HALLMARK_APICAL_JUNCTION | -0.007 | 0.449 | 0.707 |
| HALLMARK_MITOTIC_SPINDLE | -0.005 | 0.452 | 0.707 |
| HALLMARK_DNA_REPAIR | -0.005 | 0.466 | 0.707 |
| HALLMARK_KRAS_SIGNALING_UP | -0.010 | 0.523 | 0.767 |
| HALLMARK_TGF_BETA_SIGNALING | 0.005 | 0.537 | 0.767 |
| HALLMARK_ESTROGEN_RESPONSE_EARLY | -0.007 | 0.578 | 0.803 |
| HALLMARK_E2F_TARGETS | -0.010 | 0.607 | 0.818 |
| HALLMARK_COMPLEMENT | -0.006 | 0.629 | 0.818 |
| HALLMARK_G2M_CHECKPOINT | -0.008 | 0.638 | 0.818 |
| HALLMARK_TNFA_SIGNALING_VIA_NFKB | 0.005 | 0.713 | 0.891 |
| HALLMARK_NOTCH_SIGNALING | 0.003 | 0.779 | 0.930 |
| HALLMARK_IL6_JAK_STAT3_SIGNALING | 0.004 | 0.789 | 0.930 |
| HALLMARK_EPITHELIAL_MESENCHYMAL_TRANSITION | 0.005 | 0.816 | 0.930 |
| HALLMARK_UV_RESPONSE_DN | 0.002 | 0.820 | 0.930 |
| HALLMARK_BILE_ACID_METABOLISM | -0.001 | 0.853 | 0.930 |
| HALLMARK_INFLAMMATORY_RESPONSE | -0.002 | 0.875 | 0.930 |
| HALLMARK_APOPTOSIS | -0.001 | 0.880 | 0.930 |
| HALLMARK_WNT_BETA_CATENIN_SIGNALING | -0.001 | 0.907 | 0.930 |
| HALLMARK_APICAL_SURFACE | -0.001 | 0.911 | 0.930 |
| HALLMARK_ALLOGRAFT_REJECTION | 0.001 | 0.973 | 0.973 |
