# Supplementary material for: Differences in the Tumor Molecular and Microenvironmental Land-Scape Between Early (Non-metastatic) and De Novo Metastatic Primary Luminal Breast Tumors
Source: Preprints.org preprint supplement (doi:10.20944/preprints202306.1845.v1), 2023-06-27
Supplement: Supplementary file 3 [file supplementary › Supplementary Table S3 - Hypoxia-related DEGs.docx]

**Supplementary Table S3: Hypoxia-related DEG differences found between dnMBC and eBC tumors.** The gene name, ENSG number, log fold change (logFC), log counts per million (logCPM), log fold change ratio (LR), raw p-value, and FDR-corrected p-value are reported. The base of the log is 2. The direction of logFC is dnMBC vs. eBC. A negative value means a downregulation of the DEG in dnMBC tumors and a positive value means an upregulation of the DEG in dnMBC tumors compared to eBC tumors. The p-values were calculated using paired t-test by using EdgeR. ENSG: Ensembl gene ID; FDR: false discovery rate.

| **Gene name** | **ENSG number** | **logFC** | **logCPM** | **LR** | **P-value** | |
| --- | --- | --- | --- | --- | --- | --- |
| **Raw** | **FDR** |
| HIF1A | ENSG00000100644 | 1.064 | 7.307 | 39.985 | <0.001 | <0.001 |
| MMP2 | ENSG00000087245 | 1.055 | 8.390 | 15.816 | <0.001 | <0.001 |
| P4HA1 | ENSG00000122884 | 0.382 | 5.941 | 8.492 | 0.004 | 0.013 |
| PLOD2 | ENSG00000152952 | 0.426 | 6.440 | 7.622 | 0.006 | 0.020 |
| LOX | ENSG00000113083 | 0.928 | 3.511 | 10.528 | 0.001 | 0.005 |
| VEGFC | ENSG00000150630 | 0.677 | 2.758 | 7.501 | 0.006 | 0.021 |
| ZEB1 | ENSG00000148516 | 0.462 | 7.148 | 7.618 | 0.006 | 0.020 |
