# Supplementary material for: Differences in the Tumor Molecular and Microenvironmental Land-Scape Between Early (Non-metastatic) and De Novo Metastatic Primary Luminal Breast Tumors
Source: Preprints.org preprint supplement (doi:10.20944/preprints202306.1845.v1), 2023-06-27
Supplement: Supplementary file 3 [file supplementary › Supplementary Table S6 - NLR data.docx]

**Supplementary Table S6: Baseline neutrophil-to-lymphocyte ratio (NLR), neutrophil counts (percentage and absolute values), and lymphocyte counts (percentage and absolute values) of both study cohorts.**

| **Variables** | **Statistics** | ***De novo* metastasized BC group (dnMBC)** | **Non-primary metastasized BC group (eBC)** |
| --- | --- | --- | --- |
| **NLRa** |  |  |  |
|  | N | 31 | 32 |
|  | Median | 3.54 | 2.55 |
|  | Average | 3.46 | 3.17 |
|  | Range | [0.58; 6.85] | [1.44; 12.00] |
| Unknown | n/N (%) | 1/32 (3%) | 0/32 (0%) |
|  |  |  |  |
| **Neutrophil count (109/L)** |  |  |  |
|  | Median | 4.90 | 4.45 |
|  | Average | 5.33 | 4.98 |
|  | Range | [1.40; 9.30] | [2.40; 11.50] |
| Unknown | n/N (%) | 1/32 (3%) | 0/32 (0%) |
|  |  |  |  |
| **Neutrophil count (%)** |  |  |  |
|  | Median | 70.70 | 65.95 |
|  | Average | 67.66 | 66.08 |
|  | Range | [31.00; 82.00] | [49.80; 86.80] |
| Unknown | n/N (%) | 1/32 (3%) | 0/32 (0%) |
|  |  |  |  |
| **Lymphocyte count (109/L)** |  |  |  |
|  | Median | 1.60 | 1.70 |
|  | Average | 1.72 | 1.78 |
|  | Range | [0.90; 3.10] | [0.60; 4.20] |
| Unknown | n/N (%) | 1/32 (3%) | 0/32 (0%) |
|  |  |  |  |
| **Lymphocyte count (%)** |  |  |  |
|  | Median | 20.80 | 25.85 |
|  | Average | 23.34 | 24.95 |
|  | Range | [11.90; 51.70] | [7.60; 34.00] |
| Unknown | n/N (%) | 1/32 (3%) | 0/32 (0%) |
|  |  |  |  |
| a NLR was calculated by dividing absolute value of neutrophils (109/L) over an absolute value of lymphocytes (109/L) | | | |
|  |
|  |
