# Supplementary material for: Differences in the Tumor Molecular and Microenvironmental Land-Scape Between Early (Non-metastatic) and De Novo Metastatic Primary Luminal Breast Tumors
Source: Preprints.org preprint supplement (doi:10.20944/preprints202306.1845.v1), 2023-06-27
Supplement: Supplementary file 3 [file supplementary › Supplementary Table S7 - Immunity-related DEGs.docx]

**Supplementary Table S7:** **Immunity-related DEG differences found between dnMBC and eBC tumors.** The gene name, ENSG number, log fold change (logFC), log counts per million (logCPM), log fold change ratio (LR), raw p-value, and FDR-corrected p-value are reported. The base of the log is 2. The direction of logFC is dnMBC vs. eBC. A negative value means a downregulation of the DEG in dnMBC tumors and a positive value means an upregulation of the DEG in dnMBC tumors compared to eBC tumors. The p-values were calculated using paired t-test by using EdgeR. ENSG: Ensembl gene ID; FDR: false discovery rate.

| **Gene name** | **ENSG number** | **logFC** | **logCPM** | **LR** | **P-value** | |
| --- | --- | --- | --- | --- | --- | --- |
| **Raw** | **FDR** |
| CCL11 | ENSG00000172156 | 1.713 | 0.248 | 7.326 | 0.007 | 0.023 |
| CCL19 | ENSG00000172724 | 1.184 | 0.579 | 7.265 | 0.007 | 0.023 |
| CCL27 | ENSG00000213927 | -1.827 | -1.190 | 6.815 | 0.009 | 0.028 |
| CCR10 | ENSG00000184451 | -2.856 | -1.405 | 11.616 | 0.001 | 0.003 |
| CCR5 | ENSG00000160791 | -1.085 | 1.750 | 7.775 | 0.005 | 0.018 |
| CCR6 | ENSG00000112486 | -0.981 | 0.703 | 6.671 | 0.010 | 0.030 |
| CD19 | ENSG00000177455 | -1.253 | 1.238 | 7.898 | 0.005 | 0.017 |
| CD27 | ENSG00000139193 | -0.578 | 2.770 | 7.123 | 0.008 | 0.025 |
| CD40 | ENSG00000101017 | -0.631 | 4.083 | 11.788 | 0.001 | 0.003 |
| CD80 | ENSG00000121594 | -0.836 | 1.933 | 7.408 | 0.006 | 0.022 |
| CXCL10 | ENSG00000169245 | 0.683 | 3.414 | 5.623 | 0.018 | 0.049 |
| CXCL11 | ENSG00000169248 | 1.486 | 1.152 | 9.967 | 0.002 | 0.007 |
| CXCL13 | ENSG00000156234 | 2.551 | 3.422 | 11.721 | 0.001 | 0.003 |
| CXCL13 | ENSG00000156234 | 2.551 | 3.422 | 11.721 | 0.001 | 0.003 |
| CXCL14 | ENSG00000145824 | 0.807 | 4.339 | 12.504 | <0.001 | 0.002 |
| CXCL2 | ENSG00000081041 | 2.292 | -1.373 | 8.149 | 0.004 | 0.016 |
| CXCL8 | ENSG00000169429 | 1.527 | 1.115 | 11.745 | 0.001 | 0.003 |
| CXCL9 | ENSG00000138755 | 1.817 | 2.827 | 26.340 | <0.001 | <0.001 |
| IFNAR1 | ENSG00000142166 | 0.816 | 5.447 | 43.703 | <0.001 | <0.001 |
| IFNGR1 | ENSG00000027697 | 0.613 | 5.956 | 19.368 | <0.001 | <0.001 |
| IL13RA1 | ENSG00000131724 | 1.056 | 6.330 | 59.113 | <0.001 | <0.001 |
| IL1R1 | ENSG00000115594 | 0.883 | 5.802 | 16.986 | <0.001 | <0.001 |
| IL1R2 | ENSG00000115590 | 1.935 | -0.351 | 7.070 | 0.008 | 0.025 |
| IL6 | ENSG00000136244 | 2.680 | -0.358 | 12.071 | 0.001 | 0.003 |
| IL6ST | ENSG00000134352 | 1.221 | 9.243 | 65.429 | <0.001 | <0.001 |
| ILF2 | ENSG00000143621 | 1.174 | 6.690 | 58.601 | <0.001 | <0.001 |
| JAK1 | ENSG00000162434 | 0.837 | 7.309 | 30.882 | <0.001 | <0.001 |
| STAT1 | ENSG00000115415 | 0.400 | 9.106 | 6.780 | 0.009 | 0.029 |
| STAT3 | ENSG00000168610 | 0.554 | 8.765 | 13.667 | <0.001 | 0.001 |
